1 **The efficacy and safety of hydroxychloroquine in COVID19 patients**  
2 **: a multicenter national retrospective cohort**

3  
4 Abdulkarim Abdulrahman<sup>1,2</sup>, Islam AlSayed<sup>3</sup>, Marwa AlMadhi<sup>4</sup>, Jumana  
5 AlArayed<sup>5</sup>, Sara Jaafar Mohammed<sup>3</sup>, Aesha Khalid Sharif<sup>5</sup>, Khadija  
6 Alansari<sup>3</sup>, Abdulla I AlAwadhi<sup>1,6</sup>, Manaf AlQahtani<sup>1,6,7\*</sup>

7  
8 <sup>1</sup> National Taskforce for Combating the Coronavirus (COVID-19),  
9 Bahrain

10 <sup>2</sup> Mohammed Bin Khalifa Cardiac Centre, Bahrain

11 <sup>3</sup> King Hamad University Hospital, Bahrain

12 <sup>4</sup> School of Medical Sciences, Faculty of Biology, Medicine and Health,  
13 University of Manchester, Manchester, United Kingdom

14 <sup>5</sup> Ministry of Health, Bahrain

15 <sup>6</sup> Bahrain Defence Force hospital, Bahrain

16 <sup>7</sup> Royal College of Surgeons in Ireland, Bahrain

17

18

19

20 \*Corresponding author: Manaf AlQahtani.

21 Email: [mqahtani@rcsi-mub.com](mailto:mqahtani@rcsi-mub.com)

22 Phone: +973 39766000

23

24

## 25 **ABSTRACT**

### 26 **Background**

27 Hydroxychloroquine is an antimalarial drug that received worldwide news and media  
28 attention in the treatment of COVID-19 patients. This drug was used based on its  
29 antimicrobial and antiviral properties despite lack of definite evidence of clinical  
30 efficacy. In this study, we aim to assess the efficacy and safety of using  
31 Hydroxychloroquine in treatment of COVID-19 patients who are admitted in acute  
32 care hospitals in Bahrain.

### 34 **Methodology**

35 We conducted retrospective cohort study on a random sample of admitted COVID19  
36 patients between 24 February and 31 July 2020. The study was conducted in four  
37 acute care COVID19 hospitals in Bahrain. Data was extracted from the medical  
38 records. The primary endpoint was the requirement of non-invasive ventilation,  
39 intubation or death. Secondary endpoint was length of hospitalization for survivors.  
40 Three methods of analysis were used to control for confounding factors: logistic  
41 multivariate regression, propensity score adjusted regression and matched  
42 propensity score analysis.

### 44 **Results**

45 A random sample of 1571 patients were included, 440 of which received HCQ  
46 (treatment group) and 1131 did not receive it (control group). Our results showed  
47 that HCQ did not have a significant effect on primary outcomes due to COVID-19  
48 infection when compared to controls after adjusting for confounders (OR 1.43 95%  
49 CI 0.85 to 2.37, P value=0.17). Co-administration of azithromycin had no effect on  
50 primary outcomes (OR 2.7 95% CI 0.82 to 8.85 P value =0.10). HCQ was found to  
51 be associated with increased risk of hypoglycemia (OR 10.9 95% CI 1.72 - 69.49, P  
52 value =0.011) and diarrhea(OR 2.8, 95% CI 1.4-5.5, P value =0.003), but not QT  
53 prolongation(OR=1.92, 95% CI 0.95-3.9, P value =0.06) or cardiac  
54 arrhythmia.(OR=1.06, 95% CI 0.55-2.05, P value =0.85).

### 56 **Conclusion**

57 Our results showed no significant beneficial effect of using hydroxychloroquine on  
58 the outcome of COVID-19 patients. Moreover, the risk of hypoglycemia due to  
59 hydroxychloroquine would possess a significant risk for out of hospital use.

62 **Keywords:** SARS-CoV-2 ; COVID19 ; Hydroxychloroquine ; safety; efficacy;  
63 azithromycin; respiratory failure

64

## 65 BACKGROUND AND SIGNIFICANCE

66 An outbreak of severe acute respiratory syndrome coronavirus-2 (SARS-CoV-2),  
67 causing the coronavirus disease 2019 (COVID19) started in December 2019, and  
68 almost a year later, we seem to be at the brink of an imminent second wave. Since it  
69 was declared a pandemic by the World Health Organisation (WHO) in March 2020 (1),  
70 it infected more than 52 million people and lead to the death of 1.3 million others (2).  
71 With no cure or vaccine identified yet, the health sector moved to repurposing available  
72 drugs.

73 One of the first and most rapidly identified was Hydroxychloroquine (HCQ), which was  
74 considered due to its antiviral activity. It was initially developed as an antimalarial drug,  
75 and is currently widely used to treat autoimmune diseases like systemic lupus  
76 erythematosus and rheumatoid arthritis (3). The efficacy of HCQ against SARS-CoV-  
77 2 was first confirmed *in vitro* and was reported to mediate its inhibition through the  
78 blockage of angiotensin-converting enzyme (ACE) II receptors which facilitate SARS-  
79 CoV-2 entry into cells (4). In addition, HCQ reportedly also disrupted the transport of  
80 SARS-CoV-2 from endosomes to endolysosomes, which is necessary for viral release  
81 (4, 5). HCQ also has immunomodulatory effects such as inhibition of antigen-  
82 presenting cell activity, in turn blocking the activation of T cells (6). This prevents the  
83 release of inflammatory cytokines, which causes the “cytokine storm” observed in  
84 COVID19 patients (6-8). The Food and Drug Administration issued an “emergency  
85 use authorization” for the use of HCQ for COVID19 patients, based on these limited  
86 results (9), which lead to an increase in HCQ use. The first clinical trial studying the  
87 use of HCQ to treat COVID19 was an open-label, non-randomized trial conducted in  
88 France. A total of 36 patients received HCQ and 16 controls, with results showing a  
89 drop in viral load amongst the HCQ group compared to the controls by day 6 of the  
90 trial (10). Observational studies that followed failed to report a therapeutic advantage  
91 of the magnitude seen in the French study, instead showing that HCQ has no effect  
92 on intubation or mortality amongst COVID19 patients (11, 12).

93 Soon after, studies showing adverse effects of HCQ use started appearing. Concerns  
94 regarding safety and efficacy increased after the infamous, and not retracted, study

95 was published in the Lancet claiming patients treated with HCQ were at a greater risk  
96 of dying at the hospital (13). A retrospective cohort study of 1438 patients hospitalized  
97 in metropolitan New York published in JAMA showed that patients who received HCQ  
98 (along with azithromycin) were at increased risk of cardiac arrest (11). The WHO  
99 discontinued the SOLIDARITY trial for HCQ after recommendation from the trial  
100 steering committee, based on evidence that HCQ produced little or no reduction in the  
101 mortality of hospitalized COVID-19 patients when compared to standard care (14).  
102 Results from the Randomized Evaluation of COVID-19 Therapy (RECOVERY) trial,  
103 showed that HCQ was not effective in reducing mortality and increasing length of  
104 hospital stay (15).

105 Results from HCQ trials and observational studies have yielded inconsistent results,  
106 making the confirmation of its efficacy difficult. This inevitably lead to a widespread  
107 confusion within the medical community and patients, with some halting its use and  
108 others continuing its administration regardless.

109 An increasing number of studies also reported enhanced HCQ activity when coupled  
110 with other drugs. Azithromycin, a macrolide antibiotic commonly used to treat chest  
111 infections, was reported to accelerate virus elimination (10, 16, 17). It was also used  
112 in the first HCQ clinical trial on 6 patients who, by day 6, tested negative (10). However,  
113 this was a very small sample size, and one of the patients tested positive again on day  
114 8. The results regarding the combinations of drugs have also been inconsistent and  
115 there is no definitive proof of efficacy.

116 Although HCQ has a better safety clinical profile compared to chloroquine (18), the  
117 drug it is derived from, there are many reported risks and side effects of HCQ usage.  
118 Along with the common side effects, including nausea and headaches, the most  
119 common side effect of HCQ use is QT interval prolongation and subsequent risk of  
120 arrhythmia (19, 20). The mechanism by which HCQ initiates arrhythmias is yet  
121 unknown, however its electrophysiological effects include blocking several currents –  
122 funny current, L-type calcium current and rectifier potassium currents (21). These lead  
123 to sinus bradycardia and repolarization abnormalities, the later leading to the observed  
124 QT prolongation (20). A clinical trial studying the effects of different chloroquine doses

125 involving 81 COVID19 patients in Brazil was prematurely stopped after patients  
126 receiving the higher dose (600mg, twice daily) developed arrhythmia within 2-3 days  
127 of starting the trial (22). Although chloroquine is known to be more toxic than HCQ,  
128 the study suggested that both drugs HCQ has also been associated with liver and  
129 renal impairment (8), both of which have also been reported in COVID19 patients (23).  
130 With suggestions that hepatic malfunctioning incidences increase with COVID-19  
131 infection (24), this side effect of HCQ use could be detrimental. This, and the lack of  
132 conclusive evidence for the efficacy of HCQ in treating COVID19, creates a reluctance  
133 amongst the public and the healthcare sector to using it. This is a retrospective  
134 observational study that aims to investigate HCQ efficacy on clinical and safety  
135 outcomes amongst COVID19 patients

136

## 137 **METHODS**

### 138 **Study design and setting**

139 A retrospective cohort study was done on COVID19 patients in Bahrain. Cases that  
140 were admitted at Ministry of Health COVID19 treatment facilities were included. The 4  
141 hospitals included were: Ebrahim bin Khalil Kanoo COVID19 Centre, SMC 6th floor  
142 COVID19 Centre, Hereditary Blood Disorder Centre (HBDC) COVID19 Centre and  
143 Jidhafs COVID19 Centre. All cases who were admitted to these facilities were  
144 confirmed to be infected by SARS-CoV-2 by a polymerase chain reaction (PCR) test  
145 of a nasopharyngeal sample. Cases admitted between 24 February to 31 July were  
146 included.

147 A random sample of cases who received HCQ and a random sample of cases who  
148 did not receive HCQ within the study time period were included. Patients who were  
149 started on NIV, intubated, died, or transferred to a different facility within 24 hours from  
150 admission were excluded from the analysis.

### 151 **Hydroxychloroquine exposure**

152 Labeling patients as “receiving HCQ” depended on whether they were received the  
153 drug at our study baseline - defined as within 72hrs of admission.  
154 The National Bahrain treatment protocol, developed by the national task force medical  
155 team, was issued to all COVID19 facilities as guidance to health care workers for the  
156 management of COVID19. HCQ was suggested for patients with COVID19 as a  
157 therapeutic option. The suggested HCQ regimen was a loading dose of 600 mg twice  
158 on day 1, followed by 400 mg daily for 4 additional days. Azithromycin at a dose of  
159 500 mg on day 1 and then 250 mg daily for 4 more days in combination with HCQ was  
160 an additional suggested therapeutic option. However, the suggestion of HCQ and/or  
161 Azithromycin was removed in April after several manuscripts showed lack of benefit  
162 from HCQ and a potential risk. Prescribing either or both medications was a decision  
163 left to the judgment of the treating team based on individualization of the patient care.

#### 164 **Data sources and variables assessed**

165 We obtained data from the “I-SEHA” electronic medical records. The I-SEHA is a  
166 doctor station which provides access to patient records and has all the clinical details  
167 of the hospital stay as text files. Data was manually extracted from the electronic  
168 records. 5 physicians who were assisted by 10 senior medical students reviewed all  
169 the cases and filled in an electronic form developed to collect data for this study. The  
170 data gathered included patients’ demographic details, vital signs, laboratory test  
171 results, medication lists, past medical history, clinical severity scale (as seen in the  
172 supplementary table attached in the appendix), oxygenation requirement on  
173 admission, the ratio of the oxygen saturation to the fraction of inspired oxygen  
174 ( $SpO_2:FiO_2$ ) at admission, requirement of ICU care, ventilator use and outcomes. A  
175 complete list of variables collected is attached in Appendix A.

#### 176 **Outcomes**

177 Primary outcome: The primary end point was the requirement of non-invasive  
178 ventilation, intubation or death. When a patient died after ventilator requirement, the  
179 timing of the primary end point was defined as the time of the first use of ventilator.

180 Safety outcomes: the development of any of the adverse events during hospital stay,  
181 after the prescription of medications. Adverse event included were cardiac arrhythmia,  
182 QT prolongation (>500ms), diarrhea and hypoglycemia (defined as glucose levels less  
183 than 3.6 mmol/L)

184 Secondary outcome was length of stay in days for survivors.

## 185 **Statistical analysis**

186 The distribution of treatment groups was summarized. Bivariate associations between  
187 the treatment group and the measured patient characteristics were analyzed using  
188 Chi-squared ( $\chi^2$ ) tests for categorical variables and t-test for continuous variables. We  
189 also assessed endpoint and adverse events and their associations with the treatment  
190 group.

191 Logistic regression model was used to estimate the relationship between HCQ use  
192 and the composite end point. A primary multivariable logistic regression model  
193 involved demographic factors, clinical factors and medications.

194 Propensity-score methods were used as well to reduce the effects of confounding and  
195 to account for the non-randomized treatment administration of HCQ. The individual  
196 propensities for receipt of HCQ treatment were estimated with the use of a  
197 multivariable logistic-regression model that included pre-treatment variables and  
198 predictors and risk for the outcome. Variables used were demographic factors, clinical  
199 factors and chronic diseases status.

200 An estimation of the association between HCQ use and the primary outcome were  
201 assessed by a multivariable logistic regression models and the use of two propensity-  
202 score methods: Propensity-score matching & the use of the propensity score as an  
203 additional covariate in the multivariate logistic regression model for the outcome.

204 Effect modification was examined for the primary outcome for two variables; (1) HCQ  
205 and the baseline severity of disease (whether or not patient was hypoxic), and (2) The  
206 co-prescription of azithromycin.



207 Estimation of the safety and secondary outcome were conducted through the use of  
208 the primary analysis, using multivariate regression models.

209 The STATA software, version 15.1, was used to execute the statistical analyses,  
210 (StataCorp. 2017. Stata Statistical Software: Release 15. College Station, TX:  
211 StataCorp LLC.).

## 212 **Ethical approval**

213 The protocol and manuscript for this study were reviewed and approved by the  
214 National COVID-19 Research Committee in Bahrain (Approval Code: CRT-  
215 COVID2020-061). The National COVID-19 Research and Ethics Committee has  
216 been jointly established by the Ministry of Health and Bahrain Defence Force  
217 Hospital research committees in response to the pandemic, to facilitate and monitor  
218 COVID-19 research in Bahrain. All methods and retrospective analysis of data was  
219 approved by the National COVID-19 Research and Ethics Committee, and carried  
220 out in accordance with the local guideline and ethical guidelines of the Declaration of  
221 Helsinki 1975. All data used in this study was collected as part of normal medical  
222 procedures. Informed consent was waived by the National COVID-19 Research and  
223 Ethics Committee for this study due to its retrospective and observational nature and  
224 the absence of any patient identifying information.

## 225 **RESULTS**

### 226 Sample Characteristics

227 A total of 1849 cases were reviewed. Of those, 278 were excluded; 57 due to  
228 duplicates, 79 due to age less than 18 years, and 34 cases were excluded due to  
229 insufficient information. A further 56 patients were excluded due to endpoint (of  
230 ventilatory support or death) being achieved within 1 day, 7 were excluded due to  
231 transfer/discharge within 1 day, and 45 were excluded as they received HCQ out of  
232 study baseline. 1571 cases were included in the study.

233

234 Out of 1571 patients affected with COVID-19 selected in this study, 440 patients  
235 received HCQ and 1131 patients did not.



236 Among the patients who received HCQ. The median time to start HCQ was 1 day from  
237 admission (IQR 0-2).

238 Patients' baseline characteristics (demographic and clinical) according to HCQ  
239 exposure is shown in Table 1 and 2. A propensity matched analysis was conducted to  
240 balance the two groups and their characteristics are also shown in Table 1 and 2.

241 In the unmatched sample, patients who received HCQ had a significantly higher mean  
242 age (43.4 years), were more likely to be Bahraini and had more comorbidities.  
243 Diabetes and hypertension were more common in patients receiving HCQ. The HCQ-  
244 receiving patients were more likely to be symptomatic (68.9% compared to 61.8%).  
245 Symptoms of fever, cough, body ache, nausea and vomiting were more predominant  
246 in patients who received HCQ. The HCQ-receiving patients were also more severely  
247 ill on admission, as 12.3% received supplemental oxygen on admission (through  
248 nasal cannula, face mask and Nonrebreather mask).

249

#### 250 The Propensity score

251 The distribution of the estimated propensity scores for receiving HCQ among patients  
252 who did and did not receive HCQ is shown in Appendix B. The C-statistic of the  
253 propensity-score model was 0.83 . In the matched analytic sample, 223 patients were  
254 exposed to HCQ and 223 were not exposed. The differences between HCQ and  
255 pretreatment variables were attenuated in the propensity-score–matched samples as  
256 compared with the unmatched samples.

257

#### 258 Primary outcome

259 During the period of their admission, patients who received HCQ were more likely to  
260 develop the composite outcome. 24 of 440 patients (5.45%) receiving HCQ developed  
261 the primary outcome of requiring ventilatory support (invasive and non-invasive) or  
262 death in comparison to the 44 of 1131 patients (3.89%) who were not treated with  
263 HCQ. Table 3 summarizes outcomes in each treatment group.

264 The difference between the two groups was not significant across the different  
265 methods used to control confounders. The primary analysis using multivariate model  
266 showed an odds ratio of 1.43 with a 95% CI 0.85 to 2.37, P value=0.17. Other methods

267 of confounding adjustment showed similar and non-significant results. Table 4  
268 summarizes the analysis results.

269

270 There was a significant effect modification in COVID-19 patients receiving HCQ and  
271 requiring supplemental oxygen on admission. Significant effect modification was also  
272 noted on in cases exposed to azithromycin. Appendix C shows the detailed effect  
273 modification analysis.

274

275 179 patients required supplemental oxygen on admission (nasal cannula, face mask  
276 or nonrebreather face mask). 75 patients received HCQ and 104 did not. Patients who  
277 were treated by HCQ were less likely to develop the outcome if they required oxygen  
278 on baseline. 15 patients in the HCQ group developed the primary outcome (20%),  
279 compared to 30 in the control group (28.85%). The difference was non-significant in  
280 the primary analysis (OR 1.09 95% CI 0.38 – 3.07).

281 1392 patients were admitted on room air and did not require supplemental oxygen. Of  
282 those, 365 received HCQ and 1027 did not. 9 patient who received HCQ developed  
283 the primary outcome (2.47%), while 14 patients in the control group developed the  
284 outcome (1.36%). Treatment with HCQ showed a non-significant increase in odds  
285 ratio to develop the primary outcome (OR 2.79 95% CI 0.92 to 8.43). Table 5  
286 summarizes the results stratified by oxygen requirement at baseline.

287 The analysis showed insignificant results when stratified by azithromycin exposure. It  
288 was noted that patients who received HCQ and azithromycin had an Odds ratio of 2.7  
289 to develop the primary outcome (95% CI 0.82 to 8.85). Patients who were treated by  
290 HCQ and did not receive azithromycin had an Odds ratio of 1.3 to develop the primary  
291 outcome (95% CI 0.44 to 3.75). Results are summarized in Table 6.

292

### 293 Safety outcome

294 Patients who received HCQ had significantly increased odds ratio to develop  
295 hypoglycemia (OR=10.9, 95% CI 1.72-69.49, P value =0.011) and diarrhea (OR=2.8,  
296 95% CI 1.4-5.5, P value =0.003). Patient treated with HCQ had more patients  
297 developing QT prolongation (OR=1.92, 95% CI 0.95-3.9, P value =0.06) and cardiac

298 arrhythmias (OR=1.06, 95% CI 0.55-2.05, P value =0.85) however these findings were  
299 non-significant. Table 7 summarizes the safety endpoints.

300

301 Secondary outcome: Length of stay in survived cases

302 The mean length of stay of discharged patients in the study cohort was 10.0 days (+/-  
303 5.54 days). The minimum stay was 2 days, and the maximum was 57. Patients who  
304 received HCQ had a mean stay of 11.3 days (5.65 days) while patients in the control  
305 group had mean stay of 9.5 days (5.41 days). The difference was statistically  
306 significant in a two-sided t-test ( $p < 0.001$ ). After adjustment for confounders using a  
307 multivariate model, HCQ had a higher length of stay by 0.63 days, however this  
308 difference was non-significant (95% CI ranged from -0.02 to 1.29). Table 8  
309 summarizes these findings.

310

311 Regression models results and details are attached in Appendix C

312 **DISCUSSION**

313 The results of this study show that, for our studied sample and models used, HCQ did  
314 not have a significant effect on primary outcomes (requirement for ventilation or death)  
315 due to COVID-19 infection.

316 Analysis of the demographics of our studied sample showed that patients who  
317 received HCQ were significantly of older age, which could be associated with a more  
318 severe HCQ-requiring presentation. Although this is an extrapolation from our data,  
319 age has reportedly been associated with a more severe progression of the disease  
320 (25-28). However, a recent study quantifying the isolated effect of age on severity of  
321 COVID-19 outcomes concluded a minimal influence of age after adjusting for  
322 important age-dependent risk factors (eg: diabetes, hypertension, cardiovascular  
323 disease (CVD) etc.) (29). Indeed, this was observed in our HCQ-receiving cohort,  
324 which showed a higher number of associated comorbidities namely diabetes mellitus,  
325 hypertension and COPD compared to the control cohort. A meta-analysis of 34 studies  
326 conducted by *Zhou et al.* showed that chronic comorbidities increase the risk of severe

327 course and progression of the disease, with strong correlations with hypertension,  
328 diabetes and CVD (30). However, there was no difference in rates of CVD presentation  
329 between the HCQ-receiving and control groups, which may be due to increased  
330 prevalence of CVD in the country (31). The HCQ receiving group had significantly less  
331 G6PD deficiency, stemming from management guidelines contraindicating HCQ in  
332 patients with G6PD deficiency due to increased risk of hemolytic crisis (32, 33).

333 Patients who received HCQ had a higher presentation of symptoms on admission and  
334 scored significantly higher on baseline clinical severity scale. Creatinine levels were  
335 significantly elevated amongst patients who received HCQ, indicating COVID-19-  
336 mediated acute kidney injury (34). A significantly higher proportion of HCQ receiving  
337 patients presented with chest x-ray findings of pneumonia compared to control  
338 patients. All these presentations on admission indicate a more severe progression of  
339 the disease that is a risk of poor prognosis (28, 34, 35), increasing risk of developing  
340 composite outcome and hence indicating HCQ requirement. This may also explain the  
341 higher incidence of composite outcomes seen amongst patients receiving HCQ.

342 Interestingly we found no difference in requirement of oxygenation on admission  
343 between the HCQ and control groups in our studied sample. This was not expected  
344 as requirement of supplemental oxygenation on admission has been associated with  
345 increased risk of severe illness (36), and hence expected to be prescribed HCQ.  
346 However, this could be interpreted alongside the increased G6PD deficiency amongst  
347 the control groups. With a high prevalence of G6PD in Bahrain (37), it may be that  
348 many severe COVID-19 admission, that potentially required oxygen on admission,  
349 were contraindicated to receive HCQ. Yet, more patients required oxygenation on  
350 baseline in the hydroxychloroquine group. This indicates that physicians tends to  
351 prescribe HCQ in the sicker patients.

352 Almost all factors were insignificant after propensity score matching analysis.  
353 However, it is important to note that to conduct matched analysis, the sample size was  
354 reduced significantly. The effect of HCQ on the development of the primary outcome  
355 remained insignificant using the various ways mentioned to control for confounders.

356 There was no significant difference in the clinical outcome between HCQ and control  
357 groups of patients with mild to moderate disease who did not require oxygen at  
358 baseline. Therefore, there is insufficient evidence to suggest benefit of using HCQ to  
359 treat patients with low risk of developing severe disease. This finding was consistent  
360 across several reports (38, 39).

361 Patients in our study who received HCQ while on oxygen therapy had lower rates of  
362 developing the primary outcome, yet this as still non-significant.

363 Our study showed no clinical benefit from using HCQ in COVID19 patients. Moreover,  
364 the effect remained non-significant across different subgroups: room air/oxygen  
365 therapy and with and without azithromycin cotreatment.

366 Our study showed no benefit from combination of azithromycin with HCQ. Other  
367 studies done in France (10) and Brazil (38) also supported our outcome, and showed  
368 no clinical benefit in using the combination of HCQ and azithromycin in the treatment  
369 of COVID-19 patients.

370 Our study showed that HCQ does not affect the length of hospitalization. The raw  
371 analysis showed a significantly higher length of stay compared to patients not  
372 receiving HCQ, consistent with several reports (15, 40). This is explained by the  
373 more severe presentation, higher comorbidities, and risk of lower prognosis leading  
374 to the administration of HCQ. Hence, patients who received HCQ would be expected  
375 to require a longer stay. Indeed, when these factors were adjusted for in the  
376 analysis, the difference was non-significant, which is consistent with other reported  
377 data (41). These findings were also reported in a randomized clinical trial conducted  
378 in china on 150 COVID19 patients. The findings in the trial did not provide evidence  
379 to support an increase in the probability of negative conversion of SARS-CoV-2  
380 conferred by the addition of HCQ to the standard of care in patients admitted to the  
381 hospital with COVID19.(39)

382 With the use of HCQ there was a significant risk of developing adverse effects,  
383 specifically hypoglycemia and diarrhea. Due to their mechanism of action, it has been  
384 well known that antimalarials cause hypoglycemia. A few studies showed the role of

385 HCQ in diabetic patients and showed a decreased requirement in insulin (42, 43). As  
386 for diarrhea, it is a known adverse effect of HCQ as well (44). The increased risk of  
387 hypoglycemia is alarming, as it would potentially be of a significant risk if patients  
388 prone to hypoglycemia or are receiving HCQ outside hospital setting.

389 The surprising result was the insignificant association between QT interval  
390 prolongation and the use of HCQ. It was difficult to find a study that supported our  
391 result, as most studies showed frequent prolongation of the QT segment (45). Our  
392 result can be explained by the local protocol used in our hospitals. As daily ECG was  
393 done for all patients on HCQ. The local protocol suggests withholding HCQ once QT  
394 exceed 470ms and can then be restarted once QT has decreased. Moreover patients  
395 with a baseline QT >470msec or those who are at risk for developing cardiac  
396 arrhythmia or QT prolongation are seldomly prescribed HCQ.

397 The findings in our study are supported by findings from multiple clinical trials and  
398 observational studies. The RECOVERY trail which randomized 4716 patients across  
399 176 hospitals in the United Kingdom. This trial showed that HCQ had no benefit in  
400 decreasing mortality nor invasive ventilation. The findings were consistent across  
401 different subgroups includes those who received and didn't receive oxygen at  
402 baseline(15) . Another trail conducted in the US which randomized 479 patients to  
403 determine if HCQ improved clinical outcomes at 14 days also supported our results.  
404 The trail was multicentered, double blinded, placebo-controlled study. The study  
405 concluded that HCQ didn't improve clinical outcomes in patient with COVID19  
406 respiratory illness. These findings were consistent in all subgroups and for all  
407 outcomes evaluated, including an ordinal scale of clinical status, mortality, organ  
408 failures, duration of oxygen use, and hospital length of stay (46). A randomized  
409 clinical trial in Brazil was conducted on 667 mild-moderate COVID19 patients to  
410 measure the effect of HCQ with or without azithromycin on the clinical status at 15  
411 days. The trial concluded that the use of HCQ, alone or with azithromycin, did not  
412 improve clinical status at 15 days as compared with standard care (38). A large  
413 observational study was conducted on 1438 hospitalized patients in COVID19  
414 patients in New York State to measure the effect of HCQ, with or without  
415 azithromycin on the mortality rates. The study concluded that HCQ, azithromycin, or

416 both, compared with neither treatment, was not significantly associated with  
417 differences in in-hospital mortality in COVID19 patients (11).

418

419 Interpreted along with these prior studies, the results of this study provide additional  
420 evidence that HCQ is not beneficial for adults hospitalized with COVID-19. Admitted  
421 and on Oxygen support

## 422 **STRENGTHS**

423 The study has several strengths. It involved majority of hospitals which provide acute  
424 care for hospitalized COVID19 cases. Moreover, our study included all hospitals that  
425 use HCQ as part of the treatment regimen. The data collection process was done  
426 manually and hence all patients files were reviewed carefully and all documented  
427 details were collected. The outcomes and adverse were collected after the  
428 medication starting date, any event occurring within 24hour of admission or prior to  
429 starting the study drug were excluded.

## 430 **LIMITATIONS**

431 The study main limitation is its design, being a retrospective observational study.  
432 Secondly, given the retrospective design, information that wasn't documented  
433 weren't available for analysis, and these can be potential confounders. These  
434 included : time from symptom onset, inflammatory markers. It is also likely that there  
435 is still unmeasured residual confounding due to factors not included in the analysis.

## 436 **CONCLUSION**

437 Our results showed no significant beneficial effect of using HCQ on the outcome of  
438 COVID-19 patients. Moreover, the risk of hypoglycemia due to HCQ would possess a  
439 significant risk for out of hospital use.



## 440 REFERENCES

- 441 1. Cucinotta D, Vanelli M. WHO Declares COVID-19 a Pandemic. *Acta Biomed.*  
442 2020;91(1):157-60.
- 443 2. WHO. WHO Coronavirus Disease (COVID-19) Dashboard 2020 [7 October 2020].  
444 Available from: <https://covid19.who.int>.
- 445 3. Silva JC, Mariz HA, Rocha LF, Oliveira PS, Dantas AT, Duarte AL, et al.  
446 Hydroxychloroquine decreases Th17-related cytokines in systemic lupus erythematosus and  
447 rheumatoid arthritis patients. *Clinics (Sao Paulo)*. 2013;68(6):766-71.
- 448 4. Liu J, Cao R, Xu M, Wang X, Zhang H, Hu H, et al. Hydroxychloroquine, a less toxic  
449 derivative of chloroquine, is effective in inhibiting SARS-CoV-2 infection in vitro. *Cell Discov.*  
450 2020;6:16.
- 451 5. Mingo RM, Simmons JA, Shoemaker CJ, Nelson EA, Schornberg KL, D'Souza RS, et al.  
452 Ebola virus and severe acute respiratory syndrome coronavirus display late cell entry  
453 kinetics: evidence that transport to NPC1+ endolysosomes is a rate-defining step. *J Virol.*  
454 2015;89(5):2931-43.
- 455 6. Zhou D, Dai SM, Tong Q. COVID-19: a recommendation to examine the effect of  
456 hydroxychloroquine in preventing infection and progression. *J Antimicrob Chemother.*  
457 2020;75(7):1667-70.
- 458 7. Huang C, Wang Y, Li X, Ren L, Zhao J, Hu Y, et al. Clinical features of patients infected  
459 with 2019 novel coronavirus in Wuhan, China. *Lancet*. 2020;395(10223):497-506.
- 460 8. Schrezenmeier E, Dörner T. Mechanisms of action of hydroxychloroquine and  
461 chloroquine: implications for rheumatology. *Nat Rev Rheumatol*. 2020;16(3):155-66.
- 462 9. Lenzer J. Covid-19: US gives emergency approval to hydroxychloroquine despite lack  
463 of evidence. *BMJ*. 2020;369:m1335.
- 464 10. Gautret P, Lagier JC, Parola P, Hoang VT, Meddeb L, Mailhe M, et al.  
465 Hydroxychloroquine and azithromycin as a treatment of COVID-19: results of an open-label  
466 non-randomized clinical trial. *Int J Antimicrob Agents*. 2020;56(1):105949.
- 467 11. Rosenberg ES, Dufort EM, Udo T, Wilberschied LA, Kumar J, Tesoriero J, et al.  
468 Association of Treatment With Hydroxychloroquine or Azithromycin With In-Hospital  
469 Mortality in Patients With COVID-19 in New York State. *JAMA*. 2020;323(24):2493-502.
- 470 12. Geleris J, Sun Y, Platt J, Zucker J, Baldwin M, Hripcsak G, et al. Observational Study of  
471 Hydroxychloroquine in Hospitalized Patients with Covid-19. *N Engl J Med*.  
472 2020;382(25):2411-8.
- 473 13. Mehra MR, Desai SS, Ruschitzka F, Patel AN. RETRACTED: Hydroxychloroquine or  
474 chloroquine with or without a macrolide for treatment of COVID-19: a multinational registry  
475 analysis. *Lancet*. 2020.
- 476 14. WHO. "Solidarity" clinical trial for COVID-19 treatments [9 November 2020].  
477 Available from: [https://www.who.int/emergencies/diseases/novel-coronavirus-  
478 2019/global-research-on-novel-coronavirus-2019-ncov/solidarity-clinical-trial-for-covid-19-  
479 treatments](https://www.who.int/emergencies/diseases/novel-coronavirus-2019/global-research-on-novel-coronavirus-2019-ncov/solidarity-clinical-trial-for-covid-19-treatments).
- 480 15. Horby P, Mafham M, Linsell L, Bell JL, Staplin N, Emberson JR, et al. Effect of  
481 Hydroxychloroquine in Hospitalized Patients with Covid-19. *N Engl J Med*. 2020.
- 482 16. Bacharier LB, Guilbert TW, Mauger DT, Boehmer S, Beigelman A, Fitzpatrick AM, et  
483 al. Early Administration of Azithromycin and Prevention of Severe Lower Respiratory Tract  
484 Illnesses in Preschool Children With a History of Such Illnesses: A Randomized Clinical Trial.  
485 *JAMA*. 2015;314(19):2034-44.

- 486 17. Andreani J, Le Bideau M, Duflot I, Jardot P, Rolland C, Boxberger M, et al. In vitro  
487 testing of combined hydroxychloroquine and azithromycin on SARS-CoV-2 shows synergistic  
488 effect. *Microb Pathog.* 2020;145:104228.
- 489 18. Marmor MF, Kellner U, Lai TY, Melles RB, Mieler WF, Ophthalmology AAO.  
490 Recommendations on Screening for Chloroquine and Hydroxychloroquine Retinopathy  
491 (2016 Revision). *Ophthalmology.* 2016;123(6):1386-94.
- 492 19. Costedoat-Chalumeau N, Hulot JS, Amoura Z, Leroux G, Lechat P, Funck-Brentano C,  
493 et al. Heart conduction disorders related to antimalarials toxicity: an analysis of  
494 electrocardiograms in 85 patients treated with hydroxychloroquine for connective tissue  
495 diseases. *Rheumatology (Oxford).* 2007;46(5):808-10.
- 496 20. Uzelac I, Iravanian S, Ashikaga H, Bhatia NK, Herndon C, Kaboudian A, et al. Fatal  
497 arrhythmias: Another reason why doctors remain cautious about  
498 chloroquine/hydroxychloroquine for treating COVID-19. *Heart Rhythm.* 2020;17(9):1445-51.
- 499 21. Capel RA, Herring N, Kalla M, Yavari A, Mirams GR, Douglas G, et al.  
500 Hydroxychloroquine reduces heart rate by modulating the hyperpolarization-activated  
501 current If: Novel electrophysiological insights and therapeutic potential. *Heart Rhythm.*  
502 2015;12(10):2186-94.
- 503 22. Borba MGS, Val FFA, Sampaio VS, Alexandre MAA, Melo GC, Brito M, et al. Effect of  
504 High vs Low Doses of Chloroquine Diphosphate as Adjunctive Therapy for Patients  
505 Hospitalized With Severe Acute Respiratory Syndrome Coronavirus 2 (SARS-CoV-2)  
506 Infection: A Randomized Clinical Trial. *JAMA Netw Open.* 2020;3(4):e208857.
- 507 23. Rismanbaf A, Zarei S. Liver and Kidney Injuries in COVID-19 and Their Effects on Drug  
508 Therapy; a Letter to Editor. *Arch Acad Emerg Med.* 2020;8(1):e17.
- 509 24. Zhang C, Shi L, Wang FS. Liver injury in COVID-19: management and challenges.  
510 *Lancet Gastroenterol Hepatol.* 2020;5(5):428-30.
- 511 25. Liu Y, Mao B, Liang S, Yang JW, Lu HW, Chai YH, et al. Association between age and  
512 clinical characteristics and outcomes of COVID-19. *Eur Respir J.* 2020;55(5).
- 513 26. Chen T, Dai Z, Mo P, Li X, Ma Z, Song S, et al. Clinical Characteristics and Outcomes of  
514 Older Patients with Coronavirus Disease 2019 (COVID-19) in Wuhan, China: A Single-  
515 Centered, Retrospective Study. *J Gerontol A Biol Sci Med Sci.* 2020;75(9):1788-95.
- 516 27. Chen T, Wu D, Chen H, Yan W, Yang D, Chen G, et al. Clinical characteristics of 113  
517 deceased patients with coronavirus disease 2019: retrospective study. *BMJ.*  
518 2020;368:m1091.
- 519 28. Feng Z, Yu Q, Yao S, Luo L, Zhou W, Mao X, et al. Early prediction of disease  
520 progression in COVID-19 pneumonia patients with chest CT and clinical characteristics. *Nat*  
521 *Commun.* 2020;11(1):4968.
- 522 29. Romero Starke K, Petereit-Haack G, Schubert M, Kämpf D, Schliebner A, Hegewald J,  
523 et al. The Age-Related Risk of Severe Outcomes Due to COVID-19 Infection: A Rapid Review,  
524 Meta-Analysis, and Meta-Regression. *Int J Environ Res Public Health.* 2020;17(16).
- 525 30. Zhou Y, Yang Q, Chi J, Dong B, Lv W, Shen L, et al. Comorbidities and the risk of  
526 severe or fatal outcomes associated with coronavirus disease 2019: A systematic review and  
527 meta-analysis. *Int J Infect Dis.* 2020;99:47-56.
- 528 31. WHO. Noncommunicable diseases country profiles 2018 [2 November 2020].  
529 Available from: [https://www.who.int/nmh/countries/2018/bhr\\_en.pdf?ua=1](https://www.who.int/nmh/countries/2018/bhr_en.pdf?ua=1).
- 530 32. Beauverd Y, Adam Y, Assouline B, Samii K. COVID-19 infection and treatment with  
531 hydroxychloroquine cause severe haemolysis crisis in a patient with glucose-6-phosphate  
532 dehydrogenase deficiency. *Eur J Haematol.* 2020;105(3):357-9.

- 533 33. Nabil A, Uto K, Elshemy MM, Soliman R, Hassan AA, Ebara M, et al. Current  
534 coronavirus (SARS-CoV-2) epidemiological, diagnostic and therapeutic approaches: An  
535 updated review until June 2020. *EXCLI J.* 2020;19:992-1016.
- 536 34. Cheng Y, Luo R, Wang K, Zhang M, Wang Z, Dong L, et al. Kidney disease is associated  
537 with in-hospital death of patients with COVID-19. *Kidney Int.* 2020;97(5):829-38.
- 538 35. Li J, Chen Z, Nie Y, Ma Y, Guo Q, Dai X. Identification of Symptoms Prognostic of  
539 COVID-19 Severity: Multivariate Data Analysis of a Case Series in Henan Province. *J Med*  
540 *Internet Res.* 2020;22(6):e19636.
- 541 36. Bhargava A, Fukushima EA, Levine M, Zhao W, Tanveer F, Szpunar SM, et al.  
542 Predictors for Severe COVID-19 Infection. *Clin Infect Dis.* 2020.
- 543 37. Al Arrayed S. Campaign to control genetic blood diseases in Bahrain. *Community*  
544 *Genet.* 2005;8(1):52-5.
- 545 38. Cavalcanti AB, Zampieri FG, Rosa RG, Azevedo LCP, Veiga VC, Avezum A, et al.  
546 Hydroxychloroquine with or without Azithromycin in Mild-to-Moderate Covid-19. *N Engl J*  
547 *Med.* 2020.
- 548 39. Tang W, Cao Z, Han M, Wang Z, Chen J, Sun W, et al. Hydroxychloroquine in patients  
549 with mainly mild to moderate coronavirus disease 2019: open label, randomised controlled  
550 trial. *BMJ.* 2020;369:m1849.
- 551 40. Almazrou SH, Almalki ZS, Alanazi AS, Alqahtani AM, AlGhamd SM. Comparing the  
552 impact of Hydroxychloroquine based regimens and standard treatment on COVID-19 patient  
553 outcomes: A retrospective cohort study. *Saudi Pharm J.* 2020.
- 554 41. Kalligeros M, Shehadeh F, Atalla E, Mylona EK, Aung S, Pandita A, et al.  
555 Hydroxychloroquine use in hospitalised patients with COVID-19: An observational matched  
556 cohort study. *J Glob Antimicrob Resist.* 2020;22:842-4.
- 557 42. Rees RG, Smith MJ. Effect of chloroquine on insulin and glucose homeostasis in  
558 normal subjects and patients with non-insulin dependent diabetes mellitus. *Br Med J (Clin*  
559 *Res Ed).* 1987;294(6576):900-1.
- 560 43. Blazar BR, Whitley CB, Kitabchi AE, Tsai MY, Santiago J, White N, et al. In vivo  
561 chloroquine-induced inhibition of insulin degradation in a diabetic patient with severe  
562 insulin resistance. *Diabetes.* 1984;33(12):1133-7.
- 563 44. Lofgren SMM, Nicol MR, Bangdiwala AS, Pastick KA, Okafor EC, Skipper CP, et al.  
564 Safety of Hydroxychloroquine among Outpatient Clinical Trial Participants for COVID-19.  
565 *medRxiv.* 2020.
- 566 45. Agstam S, Yadav A, Praveen Kumar M, Gupta A. Hydroxychloroquine and QTc  
567 prolongation in patients with COVID-19: A systematic review and meta-analysis. *Indian*  
568 *Pacing Electrophysiol J.* 2020.
- 569 46. Self WH, Semler MW, Leather LM, Casey JD, Angus DC, Brower RG, et al. Effect of  
570 Hydroxychloroquine on Clinical Status at 14 Days in Hospitalized Patients With COVID-19: A  
571 Randomized Clinical Trial. *JAMA.* 2020.

572

573

574 **Declarations**

575

576 Conflict of interest: The authors have declared that no conflict of interest exists.

577 Ethics approval and consent to participate: The study was approved by the National  
578 COVID- 19 Research and Ethics Committee.

579 Consent for publication: All authors gave their consent for publication.

580 Availability of data and materials: All the data for this study will be made available  
581 upon reasonable request to the corresponding author.

582 Funding: No funding was received to perform this study.

583 Author contributions: IS, JA, KA, SJ, AKS, MA gathered the data and supervised the  
584 data collection team. AA and AIA analyzed the data. AA, MA, JA, SJ wrote the  
585 manuscript. AA and MQ interpreted data and edited the manuscript. All authors  
586 reviewed and approved the final version of the manuscript. Manaf Alqahtani is the  
587 guarantor of this work.

588 Corresponding author:

589 Manaf AlQahtani

590 Email: [mqahtani@rcsi-mub.com](mailto:mqahtani@rcsi-mub.com)

591 Phone: +973 39766000

592

593 **Acknowledgements:**

594 We would like to express our gratitude towards our colleagues: Ammar Kheyami,  
595 Mujtaba Mal Alla, Abdulla AlMuharraqi, Zeyad Mahmood, Narjis Ali AlSheala, Ola  
596 Husain AlHalwachi, Maryam Ghazi Alarayedh, and Amna Mohamed Buheiji who  
597 played an essential role in the data collection process related to this paper. Our  
598 thanks and appreciation goes to them for their hard, dedicated work. Wishing them  
599 all the best in the future. We would also like to extend our appreciation to Dr  
600 Simone Perna who dedicated time and effort to review and help us improve the  
601 manuscript.  
602

603 **TABLES**  
604  
605

| Factor                                           | Level    | Unmatched   |             |         | Matched     |             |         |
|--------------------------------------------------|----------|-------------|-------------|---------|-------------|-------------|---------|
|                                                  |          | Control     | HCQ         | p-value | Control     | HCQ         | p-value |
| N                                                |          | 1131        | 440         |         | 223         | 223         |         |
| Age, mean (SD)                                   |          | 44.6 (15.0) | 53.4 (14.1) | <0.001  | 52.7 (14.4) | 50.5 (13.8) | 0.096   |
| male                                             |          | 688 (60.8%) | 245 (55.7%) | 0.062   | 131 (58.7%) | 122 (54.7%) | 0.39    |
| Bahraini                                         |          | 579 (51.2%) | 290 (65.9%) | <0.001  | 107 (48.0%) | 152 (68.2%) | <0.001  |
| Number of comorbidities                          | 0        | 100 (8.8%)  | 40 (9.1%)   | <0.001  | 17 (7.6%)   | 25 (11.2%)  | 0.008   |
|                                                  | 1        | 41 (3.6%)   | 43 (9.8%)   |         | 10 (4.5%)   | 25 (11.2%)  |         |
|                                                  | 2        | 17 (1.5%)   | 27 (6.1%)   |         | 7 (3.1%)    | 15 (6.7%)   |         |
|                                                  | 3        | 522 (46.2%) | 135 (30.7%) |         | 83 (37.2%)  | 66 (29.6%)  |         |
|                                                  | 4+       | 451 (39.9%) | 195 (44.3%) |         | 106 (47.5%) | 92 (41.3%)  |         |
| Sickle Cell Disease                              |          | 26 (2.3%)   | 6 (1.4%)    | 0.24    | 2 (0.9%)    | 5 (2.2%)    | 0.25    |
| G6PD Deficiency                                  |          | 134 (11.8%) | 29 (6.6%)   | 0.002   | 18 (8.1%)   | 22 (9.9%)   | 0.51    |
| Diabetes Mellitus                                |          | 273 (24.1%) | 174 (39.5%) | <0.001  | 72 (32.3%)  | 74 (33.2%)  | 0.84    |
| Cardiovascular Disease (CVD)                     |          | 105 (9.3%)  | 53 (12.0%)  | 0.10    | 23 (10.3%)  | 27 (12.1%)  | 0.55    |
| Hypertension                                     |          | 285 (25.2%) | 176 (40.0%) | <0.001  | 79 (35.4%)  | 78 (35.0%)  | 0.92    |
| Asthma                                           |          | 42 (3.7%)   | 23 (5.2%)   | 0.18    | 9 (4.0%)    | 12 (5.4%)   | 0.50    |
| Chronic Obstructive Pulmonary Disease (COPD)     |          | 2 (0.2%)    | 4 (0.9%)    | 0.035   | 0           | 0           |         |
| Obesity (BMI >=30)                               |          | 33 (2.9%)   | 20 (4.5%)   | 0.11    | 7 (3.1%)    | 13 (5.8%)   | 0.17    |
| Chronic Kidney Disease (CKD)                     |          | 37 (3.3%)   | 22 (5.0%)   | 0.11    | 12 (5.4%)   | 13 (5.8%)   | 0.84    |
| Other Chronic Lung Disease (Not asthma nor COPD) |          | 4 (0.4%)    | 2 (0.5%)    | 0.77    | 2 (0.9%)    | 1 (0.4%)    | 0.56    |
| Smoker                                           | Current  | 18 (1.9%)   | 11 (2.6%)   | 0.52    | 3 (1.6%)    | 7 (3.3%)    | 0.30    |
|                                                  | Exsmoker | 14 (1.5%)   | 4 (0.9%)    |         | 3 (1.6%)    | 1 (0.5%)    |         |
|                                                  | Never    | 921 (96.6%) | 414 (96.5%) |         | 182 (96.8%) | 207 (96.3%) |         |

606 Table 1 : Unmatched and matched patient characteristics

It is made available under a [CC-BY 4.0 International license](https://creativecommons.org/licenses/by/4.0/).

| Factor                                                        | Level                                       | Unmatched      |                |         | Matched        |                |         |
|---------------------------------------------------------------|---------------------------------------------|----------------|----------------|---------|----------------|----------------|---------|
|                                                               |                                             | Control        | HCQ            | p-value | Control        | HCQ            | p-value |
| N                                                             |                                             | 1131           | 440            |         | 223            | 223            |         |
| Symptoms on admission:                                        |                                             | 699 (61.8%)    | 303 (68.9%)    | 0.009   | 154 (69.1%)    | 151 (67.7%)    | 0.76    |
| Fever (>38C)                                                  |                                             | 230 (20.3%)    | 118 (26.8%)    | 0.005   | 48 (21.5%)     | 49 (22.0%)     | 0.91    |
| Cough                                                         |                                             | 450 (39.8%)    | 218 (49.5%)    | <0.001  | 108 (48.4%)    | 107 (48.0%)    | 0.92    |
| Chest Pain                                                    |                                             | 91 (8.0%)      | 49 (11.1%)     | 0.054   | 23 (10.3%)     | 26 (11.7%)     | 0.65    |
| Shortness of Breath                                           |                                             | 210 (18.6%)    | 85 (19.3%)     | 0.73    | 53 (23.8%)     | 48 (21.5%)     | 0.57    |
| Loss of smell                                                 |                                             | 30 (2.7%)      | 18 (4.1%)      | 0.14    | 4 (1.8%)       | 14 (6.3%)      | 0.016   |
| Loss of taste                                                 |                                             | 30 (2.7%)      | 17 (3.9%)      | 0.21    | 6 (2.7%)       | 14 (6.3%)      | 0.067   |
| Diarrhea                                                      |                                             | 61 (5.4%)      | 30 (6.8%)      | 0.28    | 14 (6.3%)      | 16 (7.2%)      | 0.71    |
| Nausea or Vomiting                                            |                                             | 46 (4.1%)      | 34 (7.7%)      | 0.003   | 9 (4.0%)       | 17 (7.6%)      | 0.11    |
| Body pain                                                     |                                             | 167 (14.8%)    | 89 (20.2%)     | 0.008   | 37 (16.6%)     | 49 (22.0%)     | 0.15    |
| Heart Rate on admission: bpm, mean (SD)                       |                                             | 85.8 (13.7)    | 86.4 (13.6)    | 0.44    | 85.4 (14.3)    | 86.6 (13.0)    | 0.35    |
| SBP on admission: mmHg, mean (SD)                             |                                             | 129.6 (18.4)   | 133.7 (18.3)   | <0.001  | 132.4 (20.7)   | 133.6 (18.8)   | 0.50    |
| DBP on admission: mmHg, mean (SD)                             |                                             | 77.9 (11.5)    | 76.8 (11.3)    | 0.080   | 78.7 (10.9)    | 77.5 (11.2)    | 0.25    |
| Requirement of Oxygen support on admission                    |                                             | 104 (9.2%)     | 54 (12.3%)     | 0.069   | 28 (12.6%)     | 27 (12.1%)     | 0.89    |
| Oxygenation device on admission                               | Nasal Canula                                | 43 (41.0%)     | 36 (66.7%)     | 0.008   | 8 (29%)        | 17 (63%)       | 0.032   |
|                                                               | Face Mask                                   | 45 (42.9%)     | 14 (25.9%)     |         | 16 (57%)       | 7 (26%)        |         |
|                                                               | Nonrebreather Face mask                     | 17 (16.2%)     | 4 (7.4%)       |         | 4 (14%)        | 3 (11%)        |         |
| SpO2:FiO2 ratio, mean (SD)                                    |                                             | 445.08 (71.63) | 439.82 (71.32) | 0.19    | 436.17 (82.08) | 438.35 (75.45) | 0.77    |
| Presence of an elevated ALT>40U/L on admission                |                                             | 249 (23.6%)    | 114 (26.8%)    | 0.19    | 49 (23.2%)     | 70 (32.0%)     | 0.043   |
| Presence of an elevated Creatinine on admission               |                                             | 78 (6.9%)      | 52 (11.8%)     | 0.001   | 23 (10.3%)     | 25 (11.2%)     | 0.76    |
| Chest Xray findings on admission                              | Pneumonia                                   | 291 (31.0%)    | 167 (39.5%)    | 0.002   | 59 (31.4%)     | 73 (33.5%)     | 0.65    |
|                                                               | Normal                                      | 648 (69.0%)    | 256 (60.5%)    |         | 129 (68.6%)    | 145 (66.5%)    |         |
| Hypotension (SBP<90mmHg or DBP<60mmHg) on admission           |                                             | 43 (3.8%)      | 14 (3.2%)      | 0.56    | 7 (3.1%)       | 7 (3.1%)       | 1.00    |
| Tachypnea (RR>22) on admission                                |                                             | 20 (1.8%)      | 11 (2.5%)      | 0.35    | 5 (2.2%)       | 8 (3.6%)       | 0.40    |
| Baseline clinical severity scale                              | Isolated and asymptomatic                   | 5 (0.4%)       | 1 (0.2%)       | <0.001  | 0 (0.0%)       | 1 (0.4%)       | 0.33    |
|                                                               | Isolated Mild symptomatic                   | 4 (0.4%)       | 1 (0.2%)       |         | 2 (0.9%)       | 1 (0.4%)       |         |
|                                                               | Admitted on Room Air                        | 1018 (90.0%)   | 363 (82.5%)    |         | 193 (86.5%)    | 182 (81.6%)    |         |
|                                                               | Admitted and on Oxygen support              | 104 (9.2%)     | 75 (17.0%)     |         | 28 (12.6%)     | 39 (17.5%)     |         |
|                                                               | Admitted and on NIV/HFNC                    | 0              | 0              |         | 0              | 0              |         |
|                                                               | Admitted and on Mechanical ventilation/ECMO | 0              | 0              |         | 0              | 0              |         |
| Azithromycin during hospital stay:                            |                                             | 150 (13.3%)    | 236 (53.6%)    | <0.001  | 59 (26.5%)     | 64 (28.7%)     | 0.60    |
| Kaletra during the hospital stay                              |                                             | 186 (16.4%)    | 82 (18.6%)     | 0.30    | 38 (17.0%)     | 39 (17.5%)     | 0.90    |
| Ribavirin during the hospital stay                            |                                             | 180 (15.9%)    | 45 (10.2%)     | 0.004   | 33 (14.8%)     | 29 (13.0%)     | 0.58    |
| Steroids during hospital stay                                 |                                             | 98 (8.7%)      | 66 (15.0%)     | <0.001  | 19 (8.5%)      | 39 (17.5%)     | 0.005   |
| Tocilizumab during hospital stay                              |                                             | 31 (2.7%)      | 29 (6.6%)      | <0.001  | 6 (2.7%)       | 15 (6.7%)      | 0.044   |
| Received Convalescent Plasma Transfusion during hospital stay |                                             | 19 (1.7%)      | 33 (7.5%)      | <0.001  | 3 (1.3%)       | 17 (7.6%)      | 0.001   |

607

608 Table 2: Unmatched and matched patient clinical characteristics

609

610

| Factor                                 | Unmatched |           |         | Matched   |           |         |
|----------------------------------------|-----------|-----------|---------|-----------|-----------|---------|
|                                        | Control   | HCQ       | p-value | Control   | HCQ       | p-value |
| N                                      | 1131      | 440       |         | 223       | 223       |         |
| Primary outcome : Ventilation or Death | 44 (3.9%) | 24 (5.5%) | 0.17    | 7 (3.1%)  | 12 (5.4%) | 0.24    |
| Ventilation                            | 41 (3.6%) | 24 (5.5%) | 0.10    | 7 (3.1%)  | 12 (5.4%) | 0.24    |
| Invasive ventilation                   | 18 (1.6%) | 9 (2.0%)  | 0.53    | 3 (1.3%)  | 6 (2.7%)  | 0.31    |
| Death                                  | 26 (2.3%) | 8 (1.8%)  | 0.56    | 6 (2.7%)  | 5 (2.24%) | 0.76    |
| Cardiac Arrhythmia:                    | 38 (3.4%) | 19 (4.3%) | 0.36    | 10 (4.5%) | 9 (4.0%)  | 0.81    |
| QT prolongation of more than 500msec   | 33 (2.9%) | 22 (5.0%) | 0.044   | 5 (2.2%)  | 13 (5.8%) | 0.054   |
| Adverse events: Hypoglycemia <3.9 / 70 | 2 (0.2%)  | 7 (1.6%)  | <0.001  | 1 (0.4%)  | 4 (1.8%)  | 0.18    |
| Adverse events: Diarrhea               | 23 (2.0%) | 27 (6.1%) | <0.001  | 5 (2.2%)  | 14 (6.3%) | 0.035   |

611  
612  
613

Table 3: Outcomes within the unmatched and matched samples



614  
615

| <b>Analysis</b>                                       | <b>Ventilation or Death</b> | <b>P Value</b> |
|-------------------------------------------------------|-----------------------------|----------------|
| <b>No. of events/no. of patients at risk (%)</b>      | 68/1571(4.3%)               | -              |
| <b>Hydroxychloroquine</b>                             | 24/440 (5.45%)              | -              |
| <b>No Hydroxychloroquine</b>                          | 44/1131(3.89%)              | -              |
| <b>Crude analysis – Odds Ratio (95%CI)</b>            | 1.43 (0.85 – 2.37)          | 0.17           |
| <b>Multivariable analysis – Odds Ratio (95%CI)</b>    | 1.65 (0.81 – 3.32)          | 0.16           |
| <b>Propensity score Analysis – Odds Ratio (95%CI)</b> |                             |                |
| <b>With Matching</b>                                  | 1.75 (0.68 – 4.54)          | 0.24           |
| <b>With Adjusted for Propensity score</b>             | 0.87 (0.47 – 1.64)          | 0.67           |

616  
617 Table 4: Risks for developing the primary outcome  
618  
619

620  
621  
622  
623  
624  
625

| <b>Analysis</b>                                  | <b>Requiring Oxygen at Baseline</b> | <b>Not Requiring Oxygen at Baseline</b> |
|--------------------------------------------------|-------------------------------------|-----------------------------------------|
| <b>No. of events/no. of patients at risk (%)</b> | 45/179 (25.14%)                     | 23/1392 (1.65%)                         |
| <b>Hydroxychloroquine</b>                        | 15/75 (20.00%)                      | 9/365 (2.47%)                           |
| <b>No Hydroxychloroquine</b>                     | 30/104 (28.85%)                     | 14/1027 (1.36%)                         |
| <b>Crude analysis – Odds Ratio (95%CI)</b>       | 1.09 (0.38 – 3.07)                  | 2.79 (0.92 – 8.43)                      |

626  
627  
628  
629  
630  
631  
632  
633  
634  
635  
636  
637

Table 5: Risks for developing the primary outcome, in cases who required and did not require supplemental oxygen at baseline

638  
639  
640  
641  
642

| <b>Analysis</b>                                       | <b>Received Azithromycin</b> | <b>Did not Received Azithromycin</b> |
|-------------------------------------------------------|------------------------------|--------------------------------------|
| <b>No. of events/no. of patients at risk (%)</b>      | 36/386 (9.3%)                | 32/1185 (2.7%)                       |
| <b>Hydroxychloroquine</b>                             | 15/236 (6.36%)               | 9/204 (4.41%)                        |
| <b>No Hydroxychloroquine</b>                          | 21/150 (14.0%)               | 23/981 (2.34%)                       |
| <b>Crude analysis – Odds Ratio (95%CI)</b>            | 0.42 (0.21 – 0.84)           | 1.92 (0.87 – 4.21)                   |
| <b>Multivariable analysis – Odds Ratio (95%CI)</b>    | 2.71 (0.82 – 8.85)           | 1.3 (0.44 – 3.75)                    |
| <b>Propensity score Analysis – Odds Ratio (95%CI)</b> |                              |                                      |
| <b>With Matching</b>                                  | 1.24 (0.26 – 5.8)            | 2.12 (0.62 – 7.18)                   |
| <b>With Adjusted for Propensity score</b>             | 0.59 (0.27 – 1.31)           | 1.38 (0.59 – 3.24)                   |

643  
644 Table 6: Risks for developing the primary outcome, in cases who received and did not receive  
645 azithromycin  
646

647  
648  
649  
650

| <b>Multivariable Analysis</b> | <b>Odds Ratio (95% CI)</b> | <b>P Value</b> |
|-------------------------------|----------------------------|----------------|
| <b>Hypoglycemia</b>           | 10.9 (1.72 – 69.49)        | 0.011          |
| <b>Diarrhoea</b>              | 2.8 (1.4 – 5.5)            | 0.003          |
| <b>QT Prolongation</b>        | 1.92 (0.95 – 3.9)          | 0.06           |
| <b>Cardiac Arrhythmia</b>     | 1.06 (0.55 – 2.05)         | 0.85           |

651  
652 Table 7: Safety outcomes and adverse events  
653  
654

655  
656  
657

| <b>Analysis</b>                                                                   | <b>Value</b>                    |         |
|-----------------------------------------------------------------------------------|---------------------------------|---------|
| <b>Overall Mean length of stay for survivors (+/- SD)</b>                         | 10.0 (5.54)                     | -       |
| <b>Length of stay in survivor in Hydroxychloroquine group - mean in days (SD)</b> | 11.3 (5.65)                     | -       |
| <b>Length of stay in survivor in the control group - mean in days (SD)</b>        | 9.5 (5.41)                      | -       |
| <b>Two Sample T test: Difference</b>                                              | - 1.77                          | P<0.001 |
| <b>Multivariable analysis – Odds Ratio (95%CI)</b>                                | 0.63<br>(95% Ci : -0.02 to 1.3) | P=0.058 |

658  
659 Table 8 : Length of stay analysis  
660  
661  
662  
663  
664  
665  
666  
667
